## ■ LABORATORY INVESTIGATIONS

Anesthesiology  
1996; 84:865-72

© 1996 American Society of Anesthesiologists, Inc.  
Lippincott-Raven Publishers

### *Anesthetic Potency of Remifentanyl in Dogs*

Luis G. Michelsen, M.D.,\* Markku Salmenperä, M.D.,† Carl C. Hug, Jr., M.D., Ph.D.,‡ Fania Szlam, M.M.Sc.,§  
Dirk VanderMeer, M.D.¶

**Background:** Remifentanyl is an opioid that is rapidly inactivated by esterases in blood and tissues. This study examined the anesthetic potency and efficacy of remifentanyl in terms of its reduction of enflurane minimum alveolar concentration (MAC) in dogs.

**Methods:** Twenty-five dogs were anesthetized with enflurane. One group received incremental infusion rates of remifentanyl from 0.055 to 5.5  $\mu\text{g} \cdot \text{kg}^{-1} \cdot \text{min}^{-1}$ . A second group received constant rate infusions of remifentanyl of 1.0  $\mu\text{g} \cdot \text{kg}^{-1} \cdot \text{min}^{-1}$  for 6-8 h. Enflurane MAC was measured before, hourly during remifentanyl infusion, and at the end of the experiment after naloxone administration. A third group received alternating infusions of 0.5 and 1.0  $\mu\text{g} \cdot \text{kg}^{-1} \cdot \text{min}^{-1}$  with MAC determinations made 30 min after each change in the infusion rate. Heart rate, mean arterial pressure, and remifentanyl blood concentrations were measured during MAC determinations.

**Results:** Enflurane MAC was reduced up to a maximum of  $63.0 \pm 10.4\%$  (mean  $\pm$  SD) in a dose-dependent manner by remifentanyl infusion. The dose producing a 50% reduction in the enflurane MAC was calculated as 0.72  $\mu\text{g} \cdot \text{kg}^{-1} \cdot \text{min}^{-1}$  and the corresponding blood concentration was calculated as 9.2 ng/ml. Enflurane MAC reduction remained stable during continuous, constant rate infusions for periods of 6-8 h without any signs of tolerance. Recovery of enflurane MAC to baseline occurred in 30 min (earliest measurement) after stopping the remifentanyl infusion.

**Conclusions:** Remifentanyl is equally efficacious and about half as potent as fentanyl, judging from the blood concentra-

tions causing equivalent reductions in enflurane MAC in the dog. The characteristics of MAC reduction are similar to those of other opioids, including the ceiling effect. Recovery from remifentanyl anesthesia is much more rapid than for any other opioid studied to date, especially after continuous infusions maintained for 6 or more h. (Key words: Anesthetics, intravenous: remifentanyl. Anesthetics, volatile: enflurane. Antagonists: naloxone. Opioids: remifentanyl. Potency: minimum alveolar concentration.)

THE use of opioids in anesthetic practice is predicated on their ability to block sympathetic (hypertension, tachycardia) and somatic (coughing, movement) responses to noxious stimulation. Administration of an opioid to a target range of plasma concentrations can block responsiveness to nociceptive stimuli for many patients.<sup>1,2</sup> However, the use of opioids alone to prevent responses to noxious stimulation requires the administration of large doses for a prolonged time in some patients, resulting in accumulation of opioid and prolonged recovery from its effects, especially respiratory depression.

Remifentanyl, the hydrochloride salt of 3-[4-methoxycarbonyl-4-[(1-oxopropyl) phenylamino]-1-piperidine] propanoic acid methyl ester, formerly designated as GI87084B, is a new synthetic opioid exhibiting  $\mu$ -opioid receptor-mediated effects, analogous to those of structurally related phenylpiperidine derivatives such as fentanyl and sufentanyl.<sup>3</sup> The unique characteristic of remifentanyl is the propanoic acid methyl ester linkage on the piperidine nitrogen, which renders it susceptible to metabolism by nonspecific esterases in blood and tissues. The terminal half-life of remifentanyl in humans ranges from 10 to 21 min, and a computer simulation showed that its context-sensitive half-time is less than 5 min no matter how large the dose or how long the infusion.<sup>4</sup> Remifentanyl is distinguished from the rest of the phenylpiperidine opioids by not only having a rapid onset and a short latency to its peak effect but also a rapid recovery. With these characteristics, remifentanyl should facilitate administration by either variable-rate infusion titrated to individual patient needs or a constant-rate infusion targeted at the

\* Assistant Professor of Anesthesiology.

† Visiting Assistant Professor of Anesthesiology. Current position: Department of Anesthesia, Helsinki Central Hospital, Helsinki, Finland.

‡ Professor of Anesthesiology and Pharmacology; Director, Division of Cardiothoracic Anesthesia.

§ Research Associate.

¶ Fellow in Cardiothoracic Anesthesia. Current position: Department of Anesthesia, University of Leiden Hospital, Leiden, The Netherlands.

Received from the Department of Anesthesiology, Emory University, Atlanta, Georgia. Submitted for publication June 27, 1995. Accepted for publication October 26, 1995. Supported by a grant from Glaxo Inc. Presented in part at the annual meeting of the American Society of Anesthesiologists, New Orleans, Louisiana, October 17-21, 1992.

Address reprint requests to Dr. Hug: Department of Anesthesiology, Emory University Hospital, 1364 Clifton Road, Atlanta, Georgia 30322.

EC<sub>99</sub> (the drug concentration that will produce a given effect in 99% of the subjects) for suppression of responses to all intensities of noxious stimulation.

The minimum alveolar concentration (MAC) at which an inhaled anesthetic agent suppresses the response to a standard stimulus in 50% of the subjects is used as a measure of anesthetic potency. The ability of opioids to reduce the MAC of enflurane in dogs facilitates comparisons of opioids and other drugs in terms of their anesthetic potency and efficacy.<sup>5-7</sup> For drugs with contrasting pharmacokinetic profiles (e.g., fentanyl *vs.* remifentanyl), a comparison can be established by maintaining stable plasma concentrations. Responses to tail-clamping in dogs seems also to allow extrapolation to the equivalent stimulus of skin incision in humans.<sup>8</sup>

## Materials and Methods

The study was approved by the Emory University Animal Use and Care Committee and followed the guidelines established by the National Institutes of Health for the ethical use of animals in research.

Mongrel dogs (N = 25) weighing  $19.9 \pm 3.3$  kg (SD) were given an intravenous dose of 0.1 mg/kg succinylcholine mixed with 0.015 mg/kg glycopyrrolate, and anesthesia was simultaneously induced with 5% enflurane in oxygen using a specialized mask and a Bain anesthesia circuit. Succinylcholine permitted immediate administration of a high concentration of enflurane and facilitated a rapid induction without the potential discomfort that the animal may experience while struggling during a slower induction.<sup>9</sup> A cuffed tube was placed in the trachea and mechanical ventilation was controlled by a Harvard respirator (South Natick, MA), adjusted to maintained normocarbida as determined by arterial blood gases. Lactated Ringer's solution was infused through a foreleg intravenous cannula at a rate of  $4 \text{ ml} \cdot \text{kg}^{-1} \cdot \text{h}^{-1}$ . An esophageal probe allowed monitoring of body temperature, which was maintained through the use of a warming blanket within  $1^\circ\text{C}$  of the temperature measured after induction of anesthesia. The electrocardiogram was monitored continuously. A percutaneous femoral artery catheter was used for continuous blood pressure monitoring on a strip chart recorder and for periodic sampling of arterial blood for gas analysis and determination of whole blood concentrations of remifentanyl and its principal metabolite (GR90291). The blood volume removed was replaced by an equal volume of 5% albumin injected intravenously after each sample.

## Assessment of Anesthesia

End-tidal enflurane concentration was measured with a Beckman LB-2 (Fullerton, CA) infrared analyzer calibrated before each experiment. The tail-clamp method was used to determine enflurane MAC.<sup>5</sup> Expired enflurane was adjusted in 0.2% increments or decrements. Minimum alveolar concentration was defined as the end-tidal concentration midway between the end-tidal concentrations of enflurane at which the animal did and did not move in response to the applied stimulus.

To determine the concentrations of remifentanyl and its main metabolite in whole blood, 1-ml aliquots of arterial blood were immediately placed in two volumes of acetonitrile (first 11 animals) or 50% citric acid solution (last 14 animals) to arrest esterase activity followed by four volumes of methylene chloride to extract remifentanyl and the metabolite into the organic phase. The samples were then stored at  $-70^\circ\text{C}$  until the time of analysis. Blood concentrations of remifentanyl were determined by gas chromatography with high-resolution mass spectrometry and selective ion monitoring (GC-HRMS-SIM)<sup>10</sup> and duplicate samples were analyzed by high-pressure liquid chromatography (see Appendix) and verified by the manufacturer (Glaxo, Research Triangle Park, NC).

## Experimental Protocol

After waiting at least 1 h after the induction of enflurane anesthesia, control enflurane MAC was determined. In the first set of experiments, six dogs received incremental infusions of remifentanyl (Glaxo) at rates from  $0.055$  to  $5.5 \mu\text{g} \cdot \text{kg}^{-1} \cdot \text{min}^{-1}$ . When each infusion rate had been constant for 30 min, enflurane MAC was determined and an arterial blood sample was obtained for remifentanyl assay. After the entire infusion sequence was completed, the infusion rate was decreased to that previously causing a 30–40% decrease of enflurane MAC, and MAC was again determined at that infusion rate. Finally, the remifentanyl infusion was stopped and the last measurement of MAC was obtained 30 min later.

In the second set of experiments, the stability of remifentanyl blood concentrations and the MAC-reducing effect were evaluated during a prolonged constant rate infusion of  $0.6 \mu\text{g} \cdot \text{kg}^{-1} \cdot \text{min}^{-1}$  in five dogs, and  $1.0 \mu\text{g} \cdot \text{kg}^{-1} \cdot \text{min}^{-1}$  in eight dogs. Remifentanyl concentrations and enflurane MAC were determined before and every hour after starting the infusion.

In the third set of  
 $1.0 \mu\text{g} \cdot \text{kg}^{-1} \cdot \text{min}^{-1}$   
 dogs to determine th  
 with each infusion  
 time. Remifentanyl  
 were determined at  
 infusion rate.

At the end of eith  
 ternating sequence  
 oxone was given, c  
 pared to the contro  
 the remifentanyl inf  
 MAC was determin

Data Analysis a  
 Remifentanyl influ  
 versus enflurane M  
 linear  $E_{\text{max}}$  regress

where  $E = \%$  red  
 fentanyl blood con  
 able enflurane MA  
 blood concentration  
 by 50% and  $\gamma =$   
 mines the slope  
 the dose-response  
 tanil were replac  
 regression was us  
 remifentanyl infu  
 Analysis of ariar  
 used to compare  
 points, and  $P <$   
 nificant. Values a

## Results

Incremental ch  
 produced propo  
 concentrations in b  
 before remifenta  
 flurane MAC was  
 $63.0 \pm 10.4\%$   
 $\mu\text{g} \cdot \text{kg}^{-1} \cdot \text{min}^{-1}$   
 small additional  
 tically significan  
 the correspondi  
 linear  $E_{\text{max}}$  mode



## ANESTHETIC POTENCY OF REMIFENTANIL IN DOGS

In the third set of experiments, infusions of 0.5 and 1.0  $\mu\text{g} \cdot \text{kg}^{-1} \cdot \text{min}^{-1}$  were alternated repeatedly in six dogs to determine the consistency of the MAC reduction with each infusion rate and blood concentration over time. Remifentanil concentration and enflurane MAC were determined at least 1 h after each change in the infusion rate.

At the end of either a continuous infusion or an alternating sequence of infusion rates, 0.1 mg/kg naloxone was given, enflurane MAC determined and compared to the control MAC in 13 of the dogs. In six dogs, the remifentanil infusion was stopped, and 30 min later MAC was determined and compared to control MAC.

#### Data Analysis and Statistics

Remifentanil infusion rates and blood concentrations *versus* enflurane MAC reductions were fitted to a non-linear  $E_{\text{max}}$  regression model<sup>11</sup>:

$$E = \frac{E_{\text{max}} \cdot C^{\gamma}}{EC_{50}^{\gamma} + C^{\gamma}}$$

where  $E$  = % reduction of enflurane MAC,  $C$  = remifentanil blood concentration,  $E_{\text{max}}$  = maximum obtainable enflurane MAC reduction, and  $EC_{50}$  = remifentanil blood concentration when enflurane MAC was reduced by 50% and  $\gamma$  = dimensionless exponent that determines the slope of the concentration-effect curve. In the dose-response analysis, concentrations of remifentanil were replaced by the infusion/rates dose. Linear regression was used to assess the correlations between remifentanil infusion rate and its blood concentrations. Analysis of variance followed by Scheffe's F test was used to compare values at the different measurement points, and  $P < 0.05$  was considered statistically significant. Values are expressed as mean  $\pm$  SD.

#### Results

Incremental changes in the remifentanil infusion rate produced proportional increases in remifentanil concentrations in blood (fig. 1). Control enflurane MAC before remifentanil administration was  $2.1 \pm 0.2\%$ . Enflurane MAC was reduced by all remifentanil doses, with a  $63.0 \pm 10.4\%$  reduction at the infusion rate of 1.0  $\mu\text{g} \cdot \text{kg}^{-1} \cdot \text{min}^{-1}$ . Higher infusion rates produced only small additional decreases in MAC that were not statistically significant. When infusion rates were related to the corresponding enflurane MAC reductions in a non-linear  $E_{\text{max}}$  model, a maximum reduction of 71.4% was

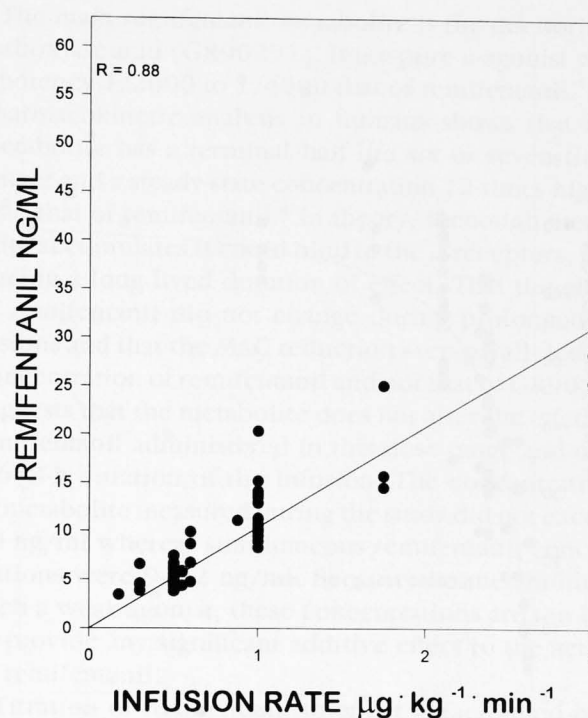

Fig. 1. Correlation between remifentanil infusion rate in micrograms per kilogram per minute and blood concentration of remifentanil in nanograms per milliliter using linear regression ( $R = 0.88$ ).

predicted (fig. 2). The dose producing a 50% reduction in the enflurane MAC solved from the same regression equation was  $0.715 \mu\text{g} \cdot \text{kg}^{-1} \cdot \text{min}^{-1}$  (95% confidence limits  $0.687$ – $0.743 \mu\text{g} \cdot \text{kg}^{-1} \cdot \text{min}^{-1}$ ). A ceiling to the enflurane MAC reduction also was apparent when blood concentrations were at and greater than 10–15 ng/ml (fig. 3). The concentration *versus* response curve describing the  $E_{\text{max}}$  model predicted a maximum MAC reduction of 75.1%. The  $EC_{50}$  was 9.2 ng/ml (95% confidence limits 8.39–10.01 ng/ml). The MAC measured at the end of the experiments after stopping remifentanil infusion with and without injection of naloxone was  $2.1 \pm 0.19\%$ , which was not different from the control enflurane MAC.

The main hemodynamic change produced by remifentanil was a dose-dependent decrease in heart rate, which was reduced by approximately 35% compared to the baseline heart rate with enflurane alone. Near maximal decreases occurred at infusion rates of 0.6  $\mu\text{g} \cdot \text{kg}^{-1} \cdot \text{min}^{-1}$  or less (fig. 4). The mean arterial pressure did not vary significantly with remifentanil, although there was a tendency toward higher systolic and lower diastolic arterial pressures along with the

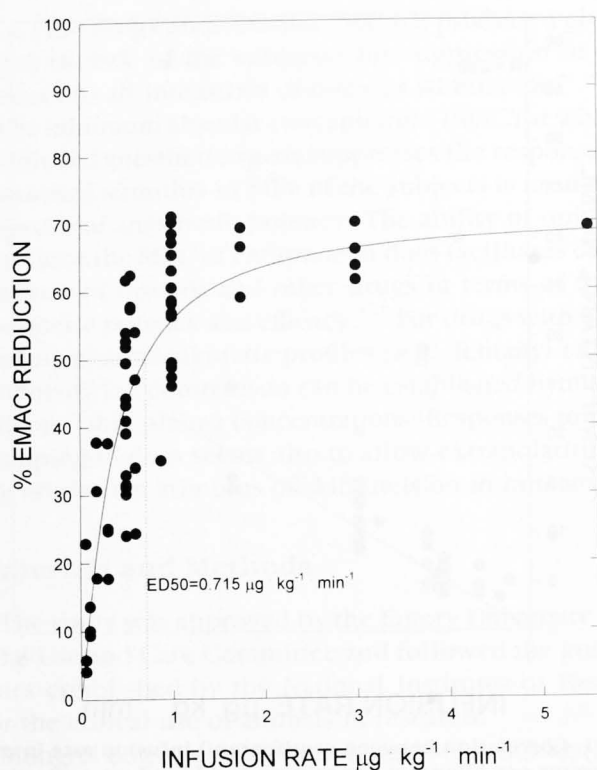

Fig. 2. Remifentanyl dose versus effect: infusion rate in micrograms per kilogram per minute versus percent reduction of enflurane minimum alveolar concentration relationship as analyzed by nonlinear regression.  $ED_{50}$  is the dose causing 50% reduction of enflurane minimum alveolar concentration.

slower heart rate. Naloxone completely antagonized the heart rate reductions caused by remifentanyl.

Prolonged infusions of remifentanyl produced a persistent reduction of enflurane MAC with no trend or significant change in the degree of MAC reduction over time (fig. 5). There was a statistically significant difference between the MAC reduction produced by an infusion of  $0.5 \mu\text{g} \cdot \text{kg}^{-1} \cdot \text{min}^{-1}$  and that of  $1.0 \mu\text{g} \cdot \text{kg}^{-1} \cdot \text{min}^{-1}$  of remifentanyl, and this difference was maintained over time even when the infusion rates were alternated (fig. 6).

Analysis of the principal metabolite of remifentanyl (GR90291) in the dogs receiving prolonged infusions showed that its concentration increased over time reaching a plateau 4 or 5 h after starting the infusion of remifentanyl. The peak concentrations measured were  $77.0 \pm 4.4 \text{ ng/ml}$  (fig. 7). The concentration of GR90291 started to decline at 450–500 min, the period when remifentanyl was decreased to  $0.5 \mu\text{g} \cdot \text{kg}^{-1} \cdot \text{min}^{-1}$ , and continued to decrease slowly after discontinuation of remifentanyl.

## Discussion

The ability to reduce the MAC of volatile anesthetics is a measure of the anesthetic activity of all central nervous system depressants, and it allows comparisons of both potency (dose or concentration for a given MAC reduction) and efficacy (maximum obtainable MAC reduction). In the standard dog model of MAC reduction, we found that remifentanyl had significant anesthetic activity. Table 1 compares the enflurane MAC reduction produced by different opioids in the same dog model.<sup>12,5-7</sup> Like other opioids, the maximum MAC reduction approximated 70%, which was unchanged by two or three times larger doses (ceiling effect). Although the extremely rapid clearance of remifentanyl allows a rapid recovery even after large doses are given, it is unlikely that this drug alone could be used as a complete anesthetic because the limiting factor will be the maximum intrinsic activity inherent in all  $\mu$ -type opioids.

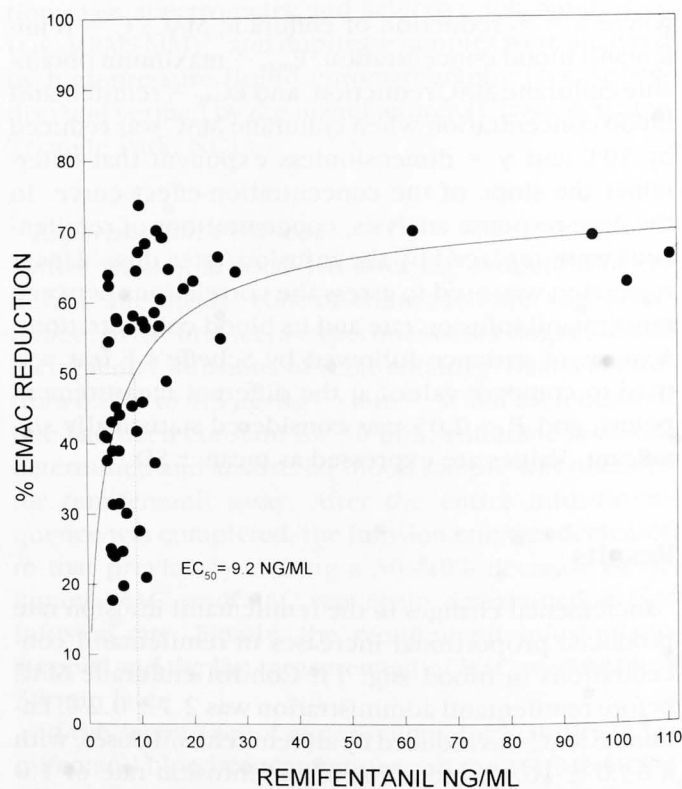

Fig. 3. Remifentanyl concentration versus effect (blood concentration in nanograms per milliliter versus percent reduction of enflurane minimum alveolar concentration) relationship as analyzed by nonlinear regression.  $EC_{50}$  is the concentration causing 50% reduction of enflurane minimum alveolar concentration.

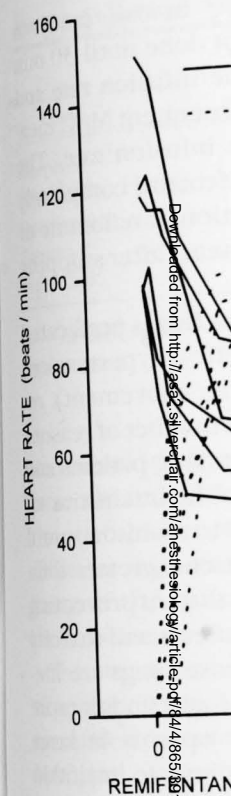

Fig. 4. Heart rate and concentration of remifentanyl (nanograms per kilogram) for an individual animal.

Prolonged infusion maintained MAC reduction. No evidence of tolerance was seen, that the amount of drug infused remained unchanged throughout the experiment. The accumulation of drug in these experiments was not such that either tolerance would occur at the end of the infusion.

The rapid clearance of remifentanyl by enzymatic hydrolysis during infusion rates used was no evidence of recovery to control values. 30 min, the earliest measurements were made after

# Egan TD, Lemme DR, Shafer SL: The G187084B (abstract)

## ANESTHETIC POTENCY OF REMIFENTANIL IN DOGS

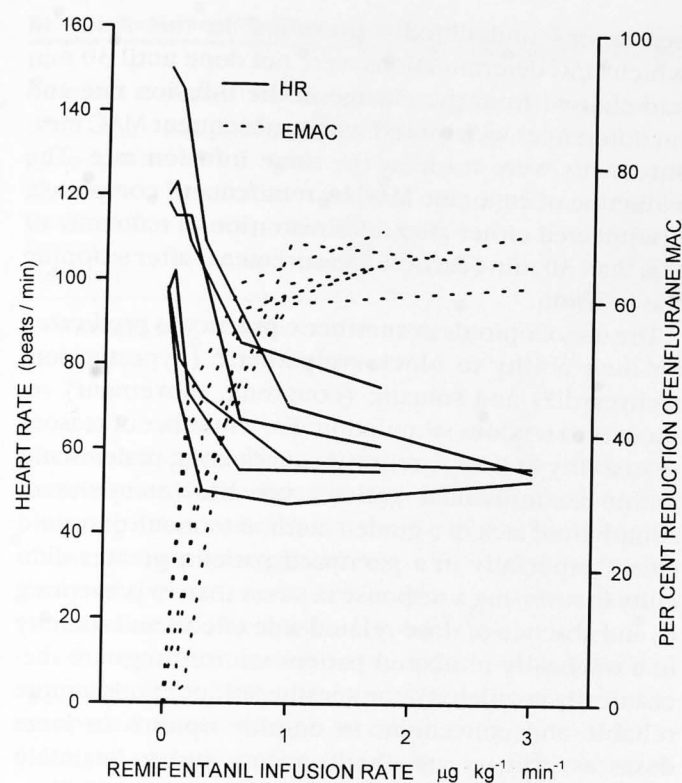

Fig. 4. Heart rate and reduction of enflurane minimum alveolar concentration as functions of remifentanil dose rate in micrograms per kilogram per minute. Each line represents data for an individual animal ( $n = 6$ , the first set of experiments).

Prolonged infusions of remifentanil resulted in a sustained MAC reduction over time and there was no evidence of tolerance. The use of alternating rates showed that the amount of MAC reduction for a given infusion rate remained unchanged and predictable throughout the experiment. This confirms the lack of remifentanil accumulation at the doses and time intervals used in these experiments. No trends were evident to suggest that either tolerance to or accumulation of remifentanil would occur at other infusion rates or duration of infusion.

The rapid clearance of remifentanil is dependent on enzymatic hydrolysis by esterases. At the extremely high infusion rates used in some of our experiments, there was no evidence of saturation of the enzymatic process; recovery to control enflurane MAC occurred in less than 30 min, the earliest time at which MAC measurements were made after stopping infusion of remifentanil.

# Egan TD, Lemmens HJM, Fiset P, Muir KT, Hermann DJ, Stanski DR, Shafer SL: The pharmacokinetics and pharmacodynamics of G187084B (abstract). *ANESTHESIOLOGY* 1992; 77:A369.

The main remifentanil metabolite is the deesterified carboxylic acid (GR90291). It is a pure  $\mu$ -agonist with a potency 1/2000 to 1/4000 that of remifentanil.<sup>13-15</sup> Pharmacokinetic analysis in humans shows that this metabolite has a terminal half-life six or seven times longer and a steady-state concentration 12 times higher than that of remifentanil.<sup>4</sup> In theory, if enough metabolite accumulates it could bind to the  $\mu$ -receptors, producing a long-lived duration of effect. That the effect of remifentanil did not change during prolonged infusions and that the MAC reduction seen paralleled the concentration of remifentanil and not that of GR90291 suggests that the metabolite does not alter the effect of remifentanil administered in this dose range and over a 6-8-h duration of the infusion. The concentrations of metabolite measured during the study did not exceed 80 ng/ml whereas simultaneous remifentanil concentrations were 9-12 ng/ml. Because the metabolite is such a weak agonist, these concentrations are too low to provide any significant additive effect to the action of remifentanil.

Titration of remifentanil to effect is facilitated by a rapid blood-brain equilibration. # Rapid clearance from effect sites (context sensitive half-time = 3.7 min) even

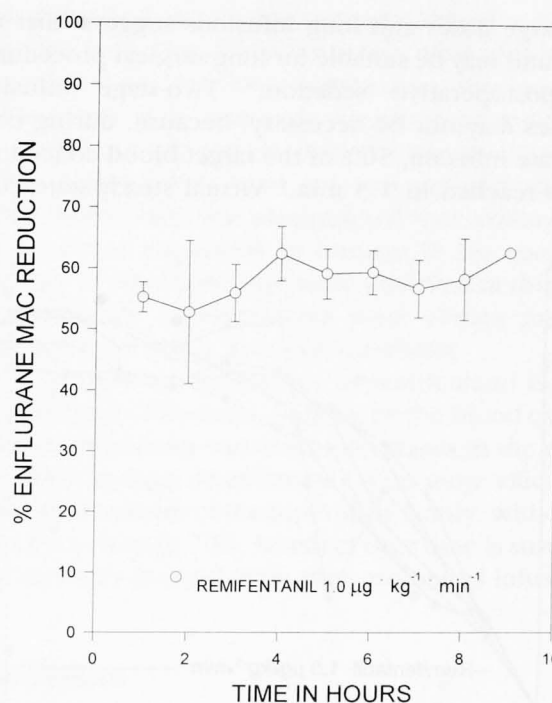

Fig. 5. Enflurane minimum alveolar concentration reduction with remifentanil over time: effect of  $1.0 \mu\text{g} \cdot \text{kg}^{-1} \cdot \text{min}^{-1}$  ( $n = 8$ ). Error bars represent  $\pm$  the SD.



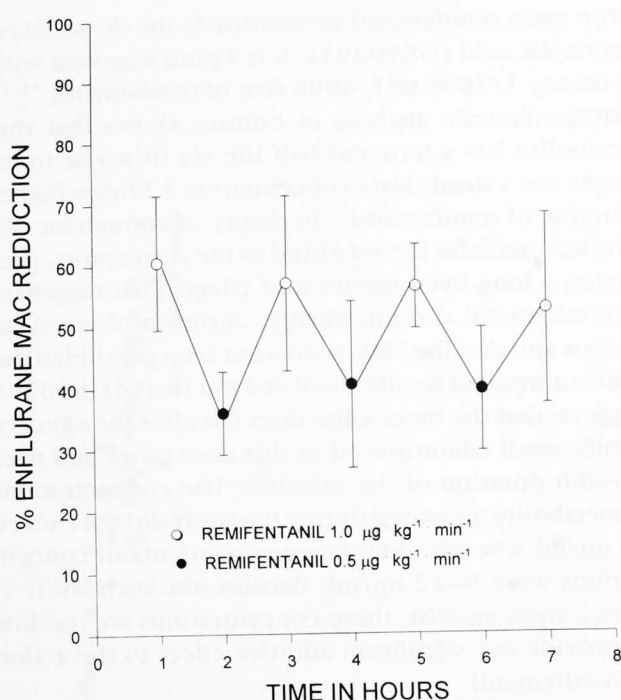

Fig. 6. Consistency of enflurane minimum alveolar concentration reduction with remifentanyl infusion of 1.0 (open circles) and 0.5 (dark circles) microgram per kilogram per minute. Error bars show  $\pm$  SD for the eight dogs.

after large doses and long infusions suggests that remifentanyl may be suitable for long surgical procedures and postoperative sedation.<sup>4</sup> Two-stage infusion schemes may not be necessary, because, during constant rate infusion, 50% of the target blood concentration is reached in 1.3 min.<sup>4</sup> Virtual steady-state con-

centrations undoubtedly prevailed in this study in which MAC determinations were not done until 30 min had elapsed from the change in the infusion rate and no differences were noted when subsequent MAC measurements were made at the same infusion rate. The reduction of enflurane MAC by remifentanyl completely disappeared either after administration of naloxone or less than 30 min (earliest measurement) after stopping the infusion.

The use of opioids in anesthetic practice is predicated on their ability to block sympathetic (hypertension, tachycardia) and somatic (coughing, movement) responses to noxious stimulation. For a number of reasons (variability in dosage requirements among patients and within an individual patient; variable intensities of stimulation; lack of a graded method to monitor opioid effect, especially in a paralyzed patient; greater difficulty in reversing a response to stress than in preventing it; and absence of dose-related side effects and toxicity in a tracheally intubated patient whose lungs are mechanically ventilated), the anesthesiologist finds it more reliable and convenient to employ opioids in large doses as primary anesthetic agents and to maintain opioid concentrations at the upper levels of their therapeutic ranges. The larger the dose and the longer the maintenance of high concentrations of presently available opioids, the greater their accumulation in the body and the longer the time required for recovery from their effects, especially ventilatory depression.<sup>2,4</sup> Precise titration of opioid administration according to the individual patient's needs is difficult for the reasons cited earlier and often is impractical because of the

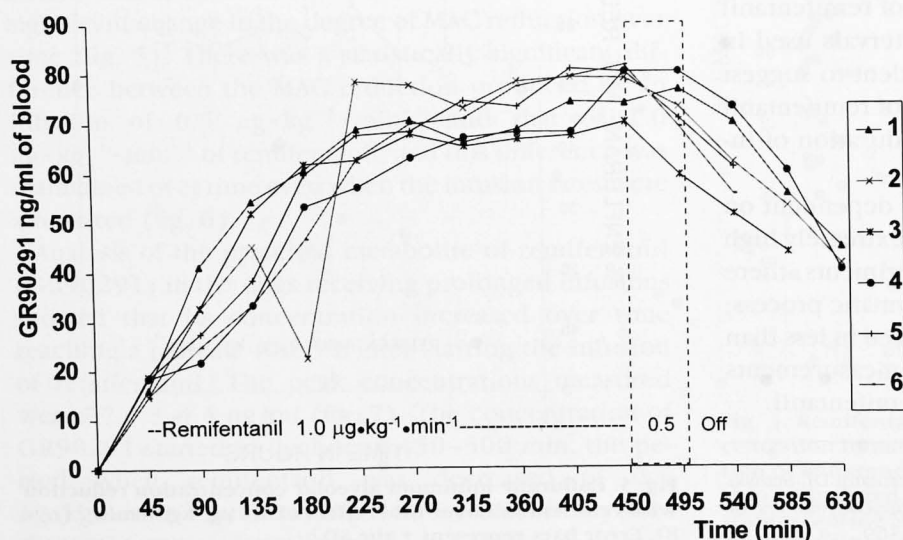

Fig. 7. Concentration in nanograms per milliliter of blood of the main metabolite of remifentanyl (GR90291) over time (in min) in dogs receiving prolonged infusions of remifentanyl ( $n = 6$ ). The dotted area represents the period where the remifentanyl infusion was decreased by 50%. After measuring minimum alveolar concentration at this level, the remifentanyl infusion was stopped.

Table 1. Enflurane Mini

| Drug                    |
|-------------------------|
| Morphine <sup>12</sup>  |
| Alfentanil <sup>6</sup> |
| Remifentanyl            |
| Fentanyl <sup>6</sup>   |
| Sufentanil <sup>7</sup> |

NA = not applicable.  
\* Whole blood.

pharmacokinetic cl  
currently available.  
alternative because  
crease or suppress  
jority of the patie  
the infusion of rem

The steady-state  
suppress the respo  
compared the ane  
MAC, tail clapping  
equivalent to sur  
flurane MAC redu  
basis for comparis  
also suggests that  
in humans and do  
remifentanyl is m  
mifentanyl has to  
of plasma, and the  
blood cells and p  
concentration of rem  
reduction (EC50  
effect is produce  
of 5.5 ng/ml in  
tition coefficient  
for dogs ( $0.49 \pm$   
of 5.5 ng/ml wo  
concentration of 5.1  
appears to be ab  
plying the same

\*\* Glass PSA, Kapil  
to determine the re  
remifentanyl (abstra

†† Pitts MC, Palm  
Jr: Pilot study: Hem  
patients undergoing  
77:A101.

## ANESTHETIC POTENCY OF REMIFENTANIL IN DOGS

Table 1. Enflurane Minimum Alveolar Concentration Reduction in Dogs with Different Opioids

| Drug                    | Maximum % Enflurane MAC Reduction | Largest Dose                                              | Highest Plasma Concentration (ng/ml) | EC <sub>50</sub> (ng/ml) |
|-------------------------|-----------------------------------|-----------------------------------------------------------|--------------------------------------|--------------------------|
| Morphine <sup>12</sup>  | 67 ± 3                            | 27 mg/kg                                                  | NA                                   | NA                       |
| Alfentanil <sup>6</sup> | 70 ± 2                            | 720 µg/kg + 80 µg · kg <sup>-1</sup> · min <sup>-1</sup>  | 2,613 ± 247                          | 54                       |
| Remifentanil            | 68 ± 2                            | 5.5 µg · kg <sup>-1</sup> · min <sup>-1</sup>             | 103 ± 10.6*                          | 9.2*                     |
| Fentanyl <sup>5</sup>   | 66 ± 2                            | 270 µg/kg + 3.2 µg · kg <sup>-1</sup> · min <sup>-1</sup> | 97 ± 31.8                            | 5.5                      |
| Sufentanil <sup>7</sup> | 78 ± 2                            | 501 µg/kg                                                 | 51 ± 4.7                             | 0.7                      |

NA = not applicable.

\* Whole blood.

pharmacokinetic characteristics of the opioids that are currently available. Remifentanil provides an attractive alternative because the effects of large doses that decrease or suppress responses to stimulation in the majority of the patients (EC99) disappear rapidly once the infusion of remifentanil is stopped.

The steady-state plasma concentrations required to suppress the response to a given stimulus are used to compare the anesthetic potency of drugs. In terms of MAC, tail clamping in dogs is believed to be a stimulus equivalent to surgical skin incision in humans.<sup>8</sup> Enflurane MAC reduction by different opioids provides a basis for comparison of their potency, and this datum also suggests that the anesthetic potencies of opioids in humans and dogs are similar.<sup>1,6</sup> Because of the way remifentanil is metabolized, the concentration of remifentanil has to be measured in whole blood instead of plasma, and the distribution of remifentanil between blood cells and plasma is not known. The *blood* concentration of remifentanil causing 50% enflurane MAC reduction (EC50) was 9.2 ng/ml, whereas this same effect is produced by a fentanyl *plasma* concentration of 5.5 ng/ml in the dog.<sup>16</sup> Using the established partition coefficient of fentanyl and mean hematocrit value for dogs ( $0.49 \pm 0.05$ ), a plasma fentanyl concentration of 5.5 ng/ml would correspond to a whole blood concentration of 5.16 ng/ml.<sup>17</sup> On this basis, remifentanil appears to be about one half as potent as fentanyl. Applying the same logic to alfentanil (EC50 = 54 ng/ml

of plasma or 33.6 ng/ml of whole blood), the corresponding blood concentration ratio between alfentanil and remifentanil should be 3.6:1. So far, there are limited studies to compare these results. Studies showing a remifentanil EC50 of 14.7–19.5 ng/ml for shifting of the spectral edge in human volunteers are in accordance with our results.<sup>18,9</sup> However, a potency ratio of 32:1 between alfentanil and remifentanil blood concentrations was found in a study achieving equivalent depression of the respiratory minute-volume.<sup>10</sup> Clearly, valid comparisons of the relative potencies of opioids mandate the use of similar endpoints or stimuli against which those comparisons are made.

Remifentanil, like other opioids, caused a dose-dependent reduction of the heart rate. Most of this effect was evident at small doses and the dose-response curve for heart rate reduction had a steeper slope and peaked at a lower concentration than the anesthetic-sparing effect. A decrease in heart rate was typically observed when remifentanil was administered with isoflurane for induction of anesthesia in humans.<sup>11</sup> No consistent changes in blood pressure were observed in this study in which the measurements were always made at equivalent (1 MAC) levels of anesthesia.

In conclusion, the potency of remifentanil is about one half that of fentanyl, judging by the blood concentrations producing equivalent decreases in the enflurane MAC in dogs. Remifentanil is no more efficacious than other opioids of the piperidine family, with a ceiling effect close to 70%. Its effect over time is sustained and recovery is rapid even after prolonged infusion.

## References

1. Aulsems ME, Hug CC Jr, Stanski DR, Burm AGL: Plasma concentrations of alfentanil required to supplement nitrous oxide anesthesia for general surgery. *ANESTHESIOLOGY* 1986; 65:362–73

\*\* Glass PSA, Kapila A, Muir KT, Hermann DJ, Shiraishi M: A model to determine the relative potency of mu opioids: Alfentanil versus remifentanil (abstract). *ANESTHESIOLOGY* 1993; 79:A378.

†† Pitts MC, Palmore MM, Salmenpera MT, BA Kirkhart, CC Hug Jr: Pilot study: Hemodynamic effects of intravenous G187084B in patients undergoing elective surgery (abstract). *ANESTHESIOLOGY* 1992; 77:A101.



2. Hall RI, Moldenhauer CC, Hug CC Jr: Fentanyl plasma concentrations maintained by simple infusion scheme in patients undergoing cardiac surgery. *Anesth Analg* 1993; 76:957-63
3. James MK, Feldman PL, Schuster SV, Bilotta JM, Brackeen MF, Leighton HJ: Opioid receptor activity of GI87084B, a novel ultrashort-acting analgesic, in isolated tissues. *J Pharmacol Exp Ther* 1991; 259:712-8
4. Westmoreland CL, Hoke JF, Sebel PS, Hug CC Jr, Muir KT: Pharmacokinetics of remifentanyl (GI87084B) and its major metabolite (GI90291) in patients undergoing elective inpatient surgery. *ANESTHESIOLOGY* 1993; 79:893-903
5. Murphy MR, Hug CC Jr: The anesthetic potency of fentanyl in terms of its reduction of enflurane MAC. *ANESTHESIOLOGY* 1982; 57:485-8
6. Hall RI, Szlam F, Hug CC Jr: The enflurane-sparing effect of alfentanil in dogs. *Anesth Analg* 1987; 66:1287-91
7. Hall RI, Murphy MR, Hug CC Jr: The enflurane-sparing effect of sufentanil in dogs. *ANESTHESIOLOGY* 1987; 67:518-25
8. Eger EI II, Saidman LJ, Brandstater B: Minimum alveolar anesthetic concentration: A standard of anesthetic potency. *ANESTHESIOLOGY* 1965; 26:756-63
9. Murphy MR, Hug CC Jr: Humaneness of anesthetic induction technique questioned: Reply. *ANESTHESIOLOGY* 1983; 59:260-1
10. Grosse CM, Davis IM, Arrendale RF, Jersey J, Amin J: Determination of remifentanyl in human blood by liquid-liquid extraction and capillary GC-HRMS-SIM using a deuterated internal standard. *J Pharm Biomed Anal* 1994; 12:195-203
11. Holford NHG, Sheiner LBL: Understanding the dose-effect relationship: Clinical application of pharmacokinetic-pharmacodynamic models. *Clin Pharmacokinet* 1981; 6:429-53
12. Murphy MR, Hug CC Jr: The enflurane sparing effect of morphine, butorphanol and nalbuphine. *ANESTHESIOLOGY* 1982; 57:489-92
13. Rosow C: Remifentanyl: A unique opioid analgesic (editorial). *ANESTHESIOLOGY* 1993; 79:875-76
14. Cunningham FE, Hoke JF, Muir KT, James MK, Hoffman WE: Pharmacokinetic/pharmacodynamic evaluation of remifentanyl, GR90291 and alfentanil (abstract). *ANESTHESIOLOGY* 1995; 83:A376
15. James MK: Remifentanyl and anesthesia for the future. *Exp Opin Invest Drugs* 1994; 3:331-40
16. Schwieger IM, Hall RI, Hug CC Jr: Less than additive antinociceptive interaction between midazolam and fentanyl in enflurane-anesthetized dogs. *ANESTHESIOLOGY* 1991; 74:1060-66

17. Meuldermans WEG, Hurkmans RMA, Heykants JJP: Plasma protein binding and distribution of fentanyl, sufentanil, alfentanil and lofentanil in blood. *Arch Int Pharmacodyn Ther* 1982; 257:4-19

18. Egan TD, Minto CF, Hermann DJ, Barr J, Muir KT, Shafer SL: Remifentanyl versus alfentanil: Comparative pharmacokinetics and pharmacodynamics in healthy adult male volunteers. *ANESTHESIOLOGY* 1996; 84:821-33

## Appendix

Blood samples (3 ml) were collected in heparinized Vacutainer tubes (Becton-Dickinson, Rutherford, NJ). A 1-ml aliquot was pipetted into a glass tube containing 20  $\mu$ l of 50% citric acid and vortexed to ensure mixing. Samples were kept frozen at  $-70^{\circ}\text{C}$  until analysis (1-8 weeks). At the time of analysis, 2 ml acetonitrile and 50 ng fentanyl (as an internal standard) were added to each sample. After vortexing, 5 ml methylene chloride was added. Samples were mixed by vortexing, and centrifuged for 5 min at 1000g to aid in clean separation of the layers. The lower organic layer was removed and applied to a Extrelut QE column (EM Separation, Gibbstown, NJ). After 5 min equilibration, remifentanyl and fentanyl were eluted with additional 5 ml methylene chloride. Organic solvent was evaporated to dryness at  $45^{\circ}\text{C}$  under a gentle stream of nitrogen. The samples were reconstituted with 40-60  $\mu$ l toluene, transferred to gas chromatography vials, which were loaded onto an autosampler, and 1- $\mu$ l aliquots were injected into an HP-5890GC (Hewlett-Packard, Palo Alto, CA) equipped with a nitrogen-phosphorus detector operated at  $250^{\circ}\text{C}$ . Injector temperature was maintained at  $250^{\circ}\text{C}$ . Separation was accomplished using fused silica megabore methyl silicone (HP-1) column (10 m  $\times$  0.53 mm ID, 2.65- $\mu$ m film thickness; Hewlett-Packard). Oven temperature was kept isothermal at  $235^{\circ}\text{C}$  for 14 min and then ramped to  $270^{\circ}\text{C}$ , at  $8^{\circ}\text{C}$  per min. The carrier and makeup gas for the detector was ultrapure grade helium at a flow of 6.5 ml/min, and 30 ml/min, respectively. Under these chromatographic conditions, remifentanyl eluted at  $\sim 7.2$  min and the internal standard (fentanyl) at  $\sim 11.2$  min.

Standards and quality control samples were processed in the same fashion as described earlier using drug-free whole blood spiked with known concentrations of remifentanyl (0-100 ng/ml). The concentrations of remifentanyl in blood samples were calculated using the regression parameters obtained from the calibration curve. The lower limit of detection was 4.0 ng/ml and the coefficient of variation was 11.0% at 5 ng/ml, 6.8% at 50 ng/ml, and 5.0% at 100 ng/ml.

Anesthesiology  
1996; 84:873-81  
© 1996 American Society of  
Lippincott-Raven Publishers

## Dexmedetomidine Produces

Tian-Zhi Guo, M.D.,\* J

**Background:**  $\alpha_2$ -Adrenergic agonists such as dexmedetomidine are used for sedation and analgesia in humans. The sedation is thought to occur through suppression of the locus ceruleus (LC) and its efferent projections, resulting in a decreased response to  $\alpha_2$ -adrenergic agonists. The sedation has not been systematically studied whether  $\alpha_2$ -adrenergic agonists have a nociceptive effect.

**Methods:** For administration, guide cannulas were implanted in Sprague-Dawley rats and microinjected into the nucleus reticularis (Rt) or the nucleus reticularis (Rt) by intracerebroventricular (ICV) injection. The nociceptive effect of the tail-flick latency was measured, which dexmedetomidine could be perturbed by atipamezole and L659,066, either into the LC or the nucleus reticularis (Rt) system. The results indicate the possibility of intrathecal administration of dexmedetomidine could reduce the characteristics of radiolabeled atipamezole (intrathecal). **Results:** Dexmedetomidine produced a dose-dependent increase in the tail-flick latency.

\* Research Associate, Center.

† Visiting Researcher, Medical Center.

‡ Anesthesiology Research, Medicine.

§ Professor of Anesthesiology, Medicine.

Received from the Department of Veterans Affairs, Palo Alto Medical Center, 3, 1995. Accepted for publication by the Department of Health (grant 302).

Address reprint requests to Dr. Guo (112A), Palo Alto Veterans Affairs Medical Center, Miranda Avenue, Palo Alto, CA 94328.

Anesthesiology, V 84
